# Supplementary material
Source: publisher figshare collection journal article supplement (https://acs.figshare.com/ndownloader/files/3918304)
Supplement: Supplementary file 1 [file 3918304]

## **Supporting Information**

### **A novel protein binder for affinity purification of human immunoglobulin antibodies**

Woosung Heu, Jung-Min Choi, Joong-Jae Lee, Sukyo Jeong, and Hak-Sung  
Kim<sup>\*</sup>

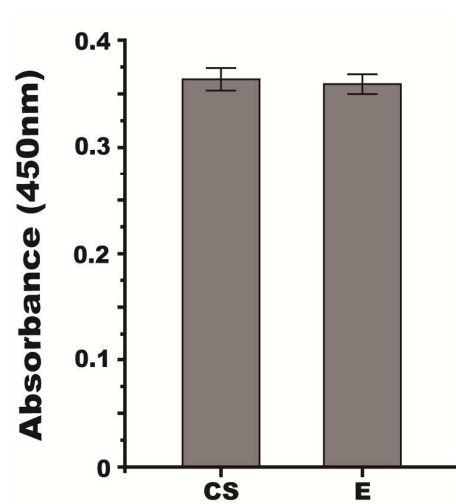

**Figure S1. ELISA of purified antibodies from a CHO cell-cultivated medium using a repebody resin.** CS, cell culture supernatant; E, eluted fraction. Experiments were carried out in quadruple.

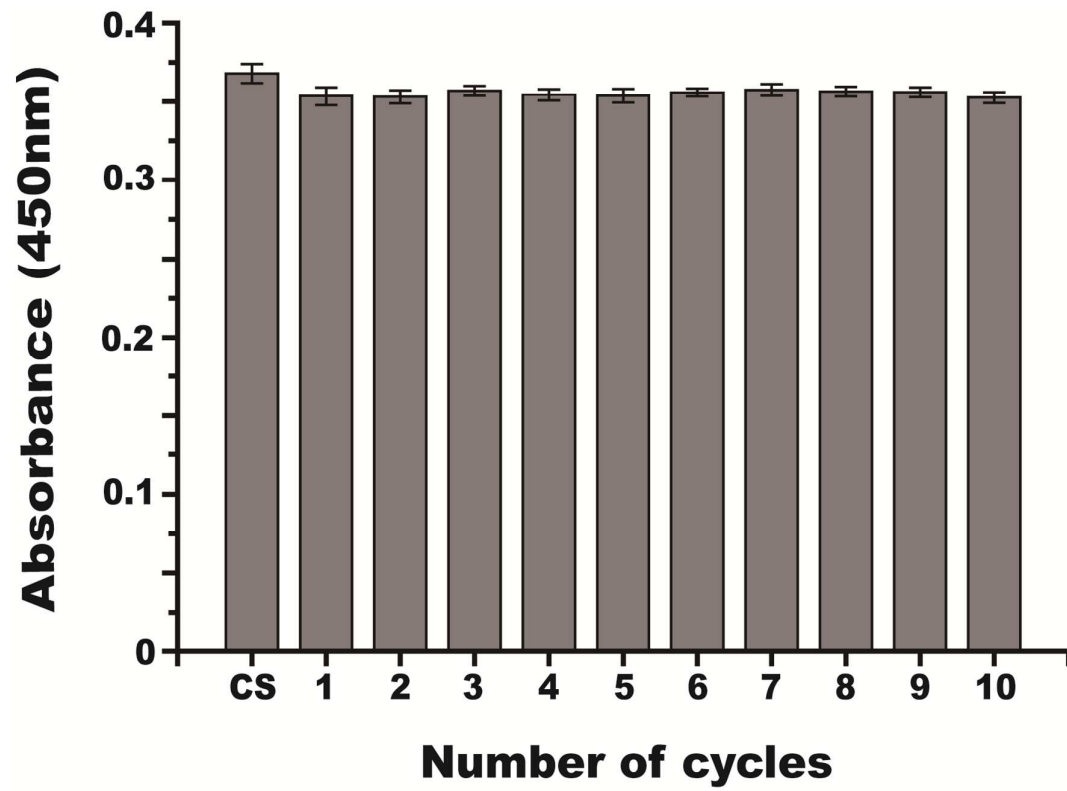

**Figure S2. ELISA of purified antibodies by a repebody resin after repeated use.** The numbers indicate the number of repetitions. CS, cell culture supernatant. Experiments were carried out in quadruple.

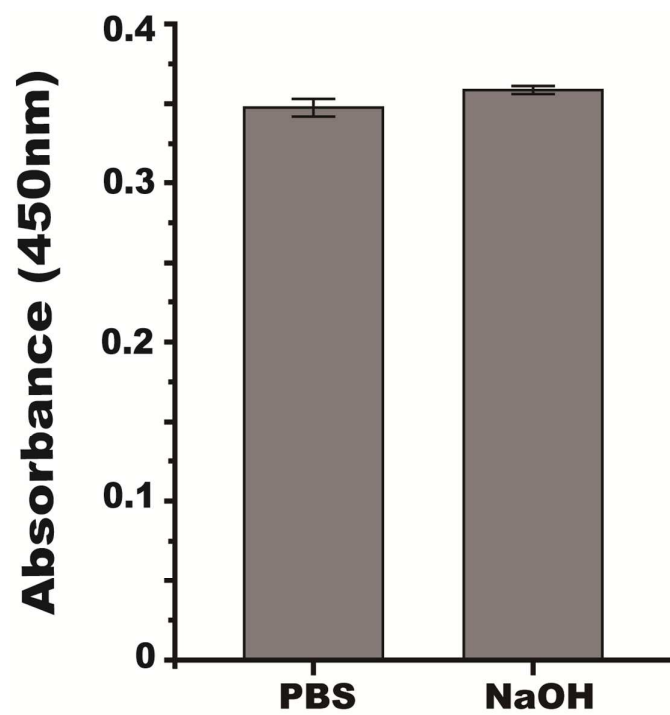

**Figure S3. ELISA of purified antibodies using a repebody resin after treated with 0.5 M NaOH for 15 days. Experiments were carried out in quadruple.**
